# Supplementary material
Source: publisher figshare collection journal article supplement (https://sage.figshare.com/ndownloader/files/11407259)

**Figure S1.** Flow chart of the study population

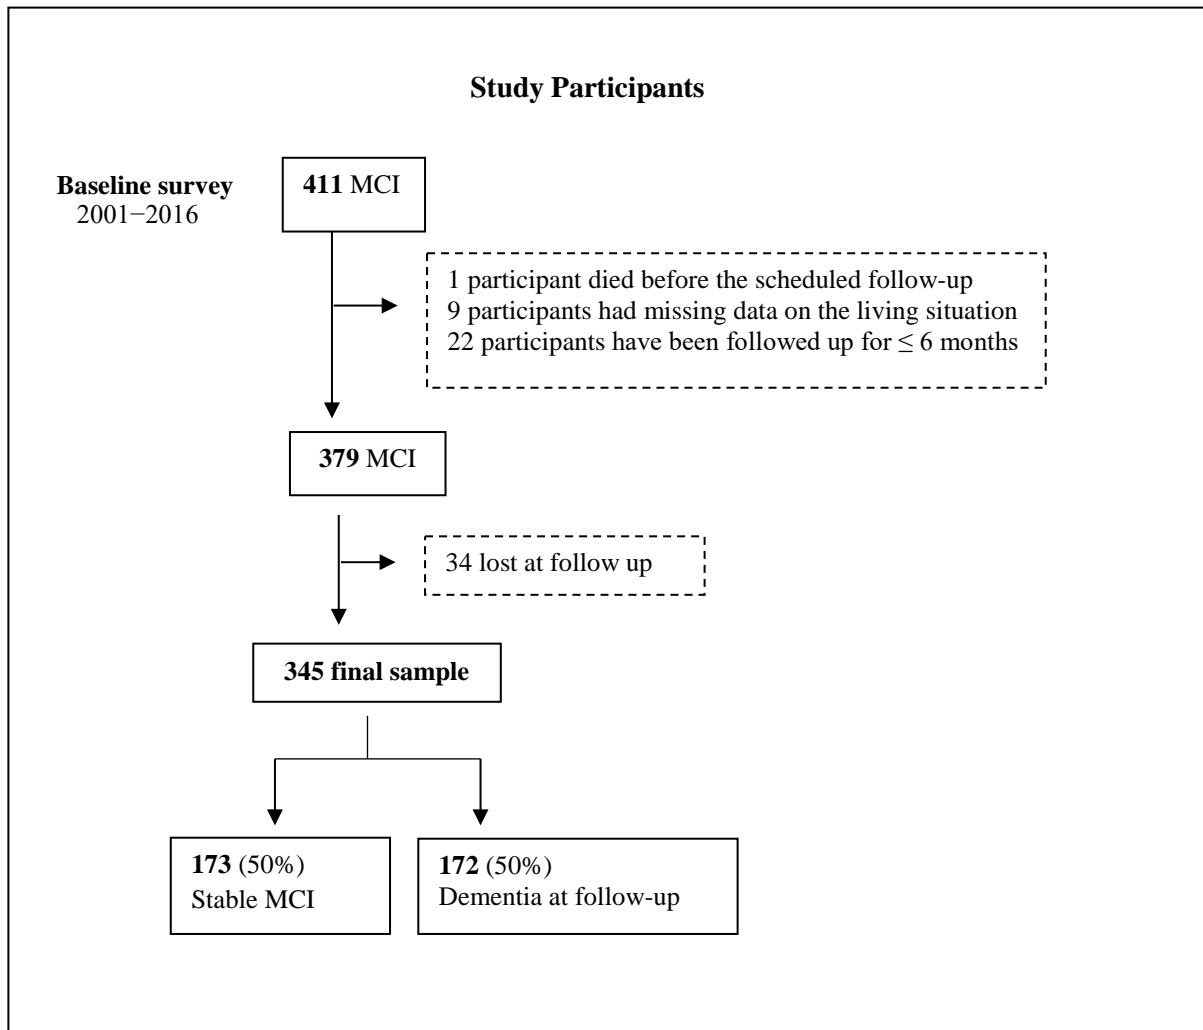

Supplement: Supplementary file 1 [file 11407259]
